# Supplementary material for: The ChemicalToolbox: reproducible, user-friendly cheminformatics analysis on the Galaxy platform
Source: PubMed Central journal article supplement (PMC7268608; doi:10.1186/s13321-020-00442-7), 2020-06-01
Supplement: 13321_2020_442_MOESM1_ESM.pdf [file 13321_2020_442_MOESM1_ESM.pdf]

## Additional material

Supplementary figures S1 to S4 depict simplified schematic diagrams depicting the four workflows discussed in the paper.

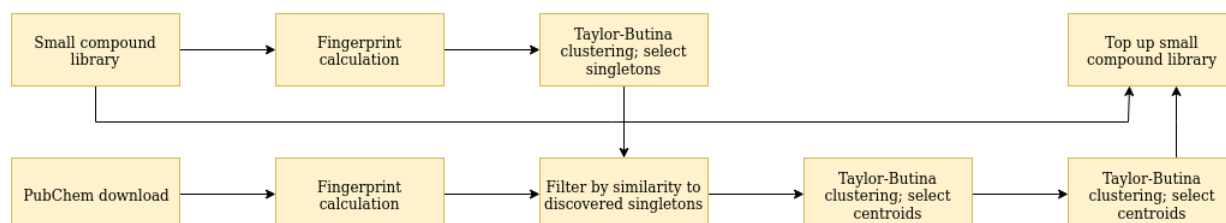

Figure S1. Hole filling.

Workflow: <https://cheminformatics.usegalaxy.eu/u/sbray/w/hf080120>

Sample history: <https://cheminformatics.usegalaxy.eu/u/sbray/h/hole-filling-1>

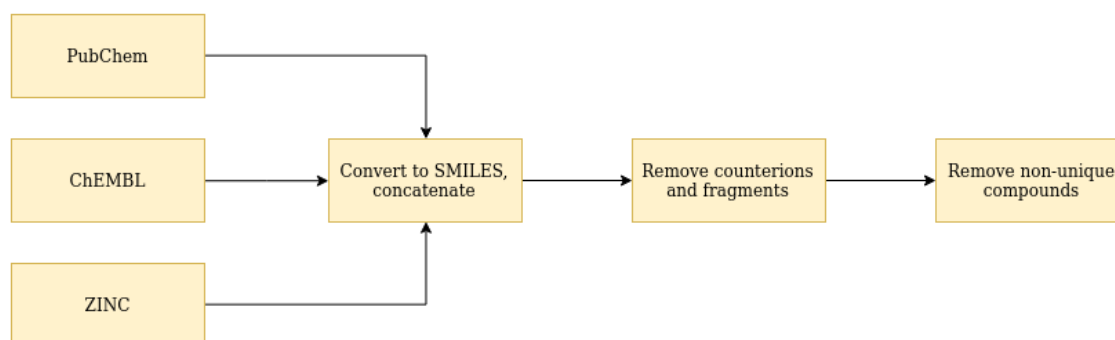

Figure S2. Ligand library preparation.

Workflow: <https://usegalaxy.eu/u/sbray/w/library-download-final-2>

Sample history: <https://usegalaxy.eu/u/sbray/h/compound-library-download>

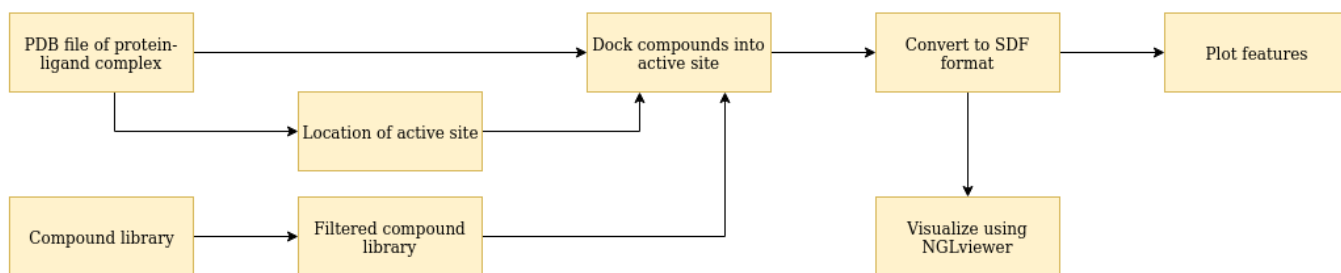

Figure S3. Protein-ligand docking.

Hsp90 workflow: <https://cheminformatics.usegalaxy.eu/u/sbray/w/protein-ligand-docking-final>

Hsp90 sample history: <https://cheminformatics.usegalaxy.eu/u/sbray/h/protein-ligand-docking>

B2AR workflow: <https://cheminformatics.usegalaxy.eu/u/sbray/w/protein-ligand-docking-b2ar>

B2AR sample history: <https://cheminformatics.usegalaxy.eu/u/sbray/h/protein-ligand-docking-b2ar>

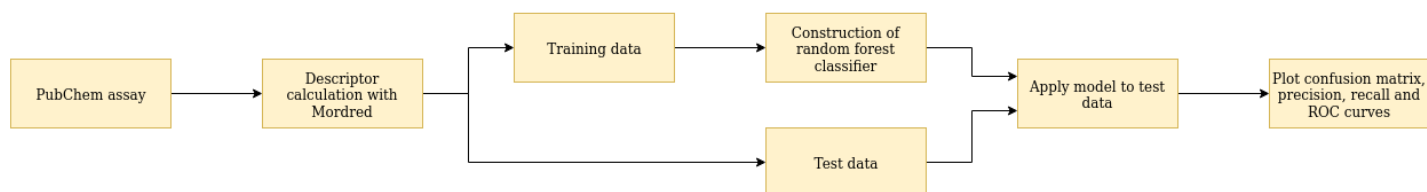

Figure S4. Machine learning for predicting small molecule protein interactions.

Workflow: <https://cheminformatics.usegalaxy.eu/u/sbray/w/cheminformatics-ml>

Sample history: <https://cheminformatics.usegalaxy.eu/u/sbray/h/cheminformatics-ml>
